# Supplementary material for: Autopsy and Statistical Evidence of Disturbed Hemostasis Progress in COVID-19: Medical Records from 407 Patients
Source: Research Square preprint supplement (doi:10.21203/rs.3.rs-44713/v4), 2021-01-06
Supplement: Supplementary file 2 [file bb170d60a3e18cf9c9fede02.xlsx]

## Sheet: Sheet1
Table S7. laboratory indices among survivors and nonsurvivors of 81 critically ill patients with COVID-19
Laboratory finding	Normal range	Survivor (n=42)		Non-survivor (n=39)		P value
		Median (IQR)	No. of patients with value derivation from normal range / total no. (%)	Median (IQR)	No. of patients with value derivation from normal range / total no. (%)
PLT - ×109/L	125～350	287.5 (199.0-370.0)	18/42 (42.9)	216.0 (142.5-273.5)	12/39 (30.8)	0.0035
GLU - mmol/L	3.89～6.11	12.92 (8.38-18.24)	37/41 (90.2)	16.43 (11.93-20.95)	39/39 (100.0)	0.0191
TC - mmol/L	3.35～5.72	4.46 (3.77-5.79)	19/41 (46.3)	3.71 (3.30-4.45)	14/39 (35.9)	0.0031
TG - mmol/L	0.48～1.71	1.97 (1.43-3.20)	21/35 (60.0)	2.07 (1.50-2.99)	20/33 (60.6)	1
HDL - mmol/L	0.91～1.78	0.92 (0.80-1.04)	18/32 (56.3)	0.75 (0.60-0.79)	25/33 (75.8)	0.004
LDL - mmol/L	1.6～3.12	2.85 (1.85-3.16)	13/32 (40.6)	2.19 (1.68-2.35)	11/33 (33.3)	0.2849
PT – s	10～14	16.7 (15.3-18.0)	39/42 (92.9)	20.2 (18.1-25.3)	38/39 (97.4)	< 0.0001
APTT – s	30～40	50.3 (42.7-66.8)	37/42 (88.1)	56.8 (45.2-69.8)	36/39 (92.3)	0.3006
TT – s	15～19	19.4 (17.6-24.6)	22/42 (52.4)	20.8 (17.2-30.8)	24/39 (61.5)	0.6705
FIB - g/L	2～4	5.75 (5.27-6.67)	39/42 (92.9)	6.12 (5.19-7.35)	33/39 (84.6)	0.4411
D-dimer - μg/mL	0～0.5	6.79 (2.82-20.61)	41/42 (97.6)	21.00 (13.42-21.00)	38/38 (100.0)	0.0013
DIC	< 5	5 (5-6)	32/42 (76.1)	6 (5-7)	33/38 (84.6)	0.0002
The denominators included in the analysis are provided if they differ from the overall numbers in the group. Reduced denominators indicate missing data.
